# Supplementary material for: Influence of ecohydrologic feedbacks from simulated crop growth on integrated regional hydrologic simulations under climate scenarios
Source: Copernicus journal article supplement (doi:10.5194/hess-16-1577-2012), 2012-06-01
Supplement: Supplementary file 2 [file Dolman_interception_brochureNL_2000.pdf › supplementary_material/Dolman_interception_brochureNL_2000.pdf]

# De rol van bossen in de waterhuishouding van Nederland

Han Dolman, Eddy Moors, Jan Elbers,  
Wim Snijders en Philip Hamaker  
Alterra, Wageningen

September 8, 2000

# 1 Colofon

In 1994 heeft het Ministerie van Landbouw, Natuurbeheer en Visserij opdracht gegeven aan het toenmalige DLO Staring Centrum (sinds 1-1-2000 Alterra) om een onderzoek te starten naar de waterhuishouding van bossen in Nederland. Dit onderzoeksproject "Hydrologie van bossen en bosgebieden in Nederland" werd begeleid door een begeleidingscommissie die bestond uit de volgende personen

ir. J.M. Brand (directie Natuur, Ministerie van Landbouw, Natuurbeheer en Visserij)

ir. G. van Tol (IKC, Natuur)

dr. ir. W. Bouten (Universiteit van Amsterdam)

Prof. A.W.L. Veen (Universiteit van Groningen)

ir. H.K.A. Rotermundt (NUON, namens de VEWIN)

ir. W.P.C. Zeeman (Staatsbosbeheer)

ir. K. Voetberg (Natuurmonumenten)

ir. H. Massop (Unie van Landschappen)

J. Deurloo (Waterschap Regge en Dinkel)

Het project werd financieel mogelijk gemaakt door het Ministerie van Landbouw, Natuurbeheer en Visserij, Staatsbosbeheer, de Vereniging van Exploitanten van Waterleidingbedrijven in Nederland, de Unie van Landschappen, Natuurmonumenten en de Europese Unie.

## 2 De rol van bossen als waterverbruiker

Kwalitatief goed water in Nederland wordt een steeds schaarser goed. Niet alleen de kwaliteit van het water in Nederland is onderwerp van discussie maar ook de beschikbaarheid. In dat kader speelt landgebruik een belangrijke rol. Grootscheepse plannen in het begin van de jaren negentig om op grote delen van de Veluwe het bos te kappen ten faveure van heidevelden liggen nog vers in het geheugen. Discussies over de hoogte van de waterschapslasten voor boseigenaren zijn eveneens al jaren onderwerp van discussie. Doorbraken in deze discussies bleven uit omdat onvoldoende inzicht bestond in de precieze grootte van de verdamping van bossen en het effect daarvan op de afvoer van water uit bosgebieden.

Het is bekend dat bossen meer water gebruiken dan grasland of vergelijkbare landbouwgewassen. Om die reden worden bossen dan ook vaak aangewezen als boosdoener bij verdroging. De discussie over de mogelijkheden om door grootschalige bosomvorming op de Veluwe meer water te genereren voor grondwateraanvulling brak onder meer los naar aanleiding van berichten over dalende grondwaterstanden in Nederland. Nieuw was die discussie over de rol van bossen in de waterhuishouding echter niet. Al in 1939 woedde een soortgelijke discussie over bosaanplant in de duinen in Noord Holland. Er werd toen onderzoek verricht naar de rol van bossen in de waterhuishouding waaruit bleek dat het percentage nuttige neerslag (de hoeveelheid neerslag die ten goede komt aan het grondwater) bij eiken en Oosterijkse dennen respectievelijk 30 en 15% van de neerslag bedraagt. Voor kale grond was dit percentage aanzienlijk hoger, tot zo'n 75% van de neerslag. Dit zijn grote verschillen en het is dan ook terecht dat er vragen worden gesteld over het effect van bos op de waterhuishouding en de grondwateraanvulling. Die vragen hebben in 1994 aanleiding gegeven tot het opstarten van een groot experimenteel onderzoek naar de waterhuishouding van bossen in Nederland. Deze brochure beschrijft de eindresultaten van dat onderzoek en geeft suggesties voor praktische rekenregels om het waterverbruik van bossen te schatten.

In de jaren na de conceptie van het onderzoek is er bij de vragen over de rol van bossen in de regionale waterhuishouding een belangrijke vraag bijgekomen: "Wat is de potentie van bosgebieden om water vast te houden?". Door hun diepere wortelzone kan er wellicht meer water in droge tijden beschikbaar worden gemaakt, mits dit water in nattere perioden is aangevoerd. Verscheidene boomsoorten kunnen langdurig met hun wortels onder water staan, zonder daar nadelige gevolgen voor de groei van te ondervinden. Hiervan gebruik makend kan er wellicht in de winter extra water worden aangevoerd en geborgen in bosgebieden, dat in de zomer dan weer gebruikt kan worden. De resultaten van dit onderzoek geven ook inzicht in grootteorde van deze bergingsmogelijkheden.

Bossen verbruiken niet alleen water. Ze genereren door hun specifieke eigenschappen ook extra neerslag. Een deel van het vocht dat door verdamping uit bossen in de atmosfeer komt, regent immers verderop, windafwaarts weer uit. In het geval van interceptieverdamping kan zo een versnelling in de hydrologische cyclus ontstaan, die lokaal en regionaal tot meer neerslag leidt. Onderzoek hiernaar staat nog in de kinderschoenen, maar deze regionale effecten van bossen op de hydrologische cyclus zijn van groot belang bij grote ontbossingprojecten in de tropen, waar de gevolgen voor het regionale klimaat vaak desastreus kunnen zijn. Het is niet uitgesloten dat ook in Europa bij grotere gebieden deze effecten

van belang zijn.

### 3 Interceptie, transpiratie en afvoer

De waterhuishouding van een bos bestaat uit een aantal componenten. De twee belangrijkste componenten in de verdamping zijn interceptie en transpiratie. Daarnaast spelen afvoer, grondwateraanvulling en veranderingen in de hoeveelheid bodemvocht ook een belangrijke rol.

- *Interceptie* is het proces waarbij neerslag die door het kronendak wordt onderschept, weer verdampt. Het wordt vaak interceptieverlies genoemd omdat het water als het ware verdwijnt zonder dat het de bosbodem bereikt. In termen van grondwateraanvulling is het dus ook een verlies. Het is vooral het interceptieverlies dat bijdraagt aan de grotere verdamping van bossen ten opzichte van graslanden en ander bouwland.
- *Transpiratie* is het proces waarbij water dat door de wortels is opgenomen verdampt door de huidmondjes van de bladeren. Tegelijkertijd nemen de bladeren dan  $\text{CO}_2$  op.
- Het water dat door het kronendak heenvalt komt op de bosbodem en vult in eerste instantie de voorraad van de onverzadigde zone aan. Hier halen de wortels het water dat voor transpiratie gebruikt wordt vandaan. Dit *bodemvocht* reservoir speelt een belangrijke rol bij het optreden van grondwateraanvulling en oppervlakkige afvoer en het reguleren van transpiratie.
- *Afvoer* is de hoeveelheid water dat uit een gebied stroomt. Dit kan plaatsvinden via het grondwater of via het oppervlakte water. De hoeveelheid water dat via het open water stelsel moet worden afgevoerd is van belang is voor de bepaling van de hoogte van de waterschapslasten.

Figure 1: De waterbalans van een bos (ref. Hillel, 1998. Environmental Soil Physics).

## 4 Het meten van de waterhuishouding van een bos

In de meeste hydrologische studies is het gebruikelijk om de grootste verliespost van de waterbalans als de restterm uit de overige componenten (neerslag, afvoer, verandering van het bodemvocht, kwel of wegzijging) te bepalen. Dit houdt in dat alle onzekerheden in de grootte van deze componenten zich ophopen in de verdamping. Moderne technieken maken het echter mogelijk deze direct te meten en zodoende de onzekerheid in de waterbalans drastisch te verminderen.

Bosverdamping bestaat uit een aantal componenten, waarvan interceptie en transpiratie de belangrijkste zijn. Op vier lokaties in Nederland zijn in de loop van 1994-1995 bospercelen beinstrumenteerd met deze meettechniek waarmee de verdamping direct gemeten kan worden. De lokaties zijn geselecteerd om een redelijk beeld van de variatie in bostypen in Nederland te hebben. Op alle vier de lokaties is precies dezelfde instrumentatie gebruikt om zo goed mogelijk te kunnen vergelijken. Naast de termen van de verdamping is ook op twee van deze plaatsen afvoer bepaald en op alle vier de lokaties is de hoeveelheid bodemvocht zorgvuldig gemonitord. Op een vijfde lokatie nabij Purmerend is alleen de afvoer, (grond-)waterstand en neerslag gemeten. Zo is een beter en nauwkeuriger beeld ontwikkeld van het waterverbruik van bossen in Nederland. De resultaten zijn gebruikt om vuistregels te formuleren die het mogelijk maken op eenvoudige wijze verdampingscomponenten (interceptie en transpiratie) van bossen te schatten.

Table 1: Omschrijving kenmerken lokaties bosproject

| Locatie                          | Boomsoort                   | Grond-<br>waterstand | Meet<br>periode | Extra's         |
|----------------------------------|-----------------------------|----------------------|-----------------|-----------------|
| <b>Zeewolde</b><br>(Fleditebos)  | Populier                    | 1-2 m                | 1995-'98        | Afvoer          |
| <b>Kootwijk</b><br>(Loobos)      | Grove den                   | 2-10 m               | 1995-'00        | CO <sub>2</sub> |
| <b>Veenhuizen</b><br>(Bankenbos) | Lariks                      | 1-2 m                | 1995-'97        |                 |
| <b>Boxtel</b><br>(Kampina)       | Gemengd loof-<br>/naaldhout | 0-2 m                | 1996-'98        | Afvoer          |
| <b>Purmerend</b><br>(Purmerbos)* | Gemengd<br>loofhout         | 0.5-2 m              | 1990-'00        | Afvoer          |

\*) Op de lokatie Purmerbos zijn uitsluitend neerslag, afvoer en de grond-waterstand gemeten.

In het najaar van 1994 is begonnen met instrumentatie. Er werd een steiger-mast opgericht waarvan de hoogte afhangt van de hoogte van het bos. Op de mast werden sensoren geplaatst die de belangrijke weersvariabelen continu meten: windsnelheid, temperatuur, relatieve vochtigheid, inkomende kort en langgolvlige straling alsook de gereflecteerde straling. Neerslag werd gemeten op de top van de mast, maar ook nabij op het open veld. Het eddy correlatie systeem is de kern van de meetopstelling. Hiermee worden direct de fluxen (stromen) van voelbare warmte, impuls en verdamping gemeten. Nadat alle gegevens doorgelicht waren en de slechte, onbetrouwbare, metingen verwijderd

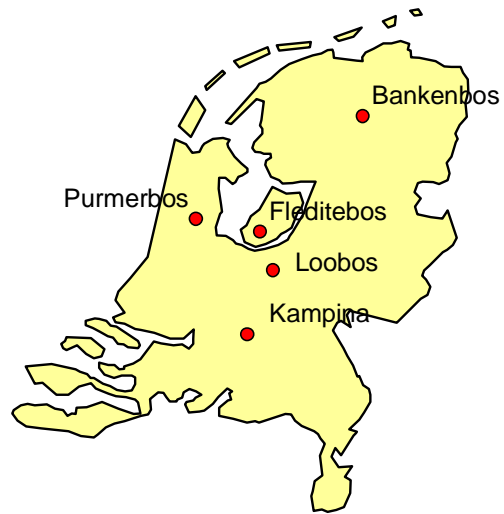

Figure 2: Meetlocaties van het boshydrologieproject

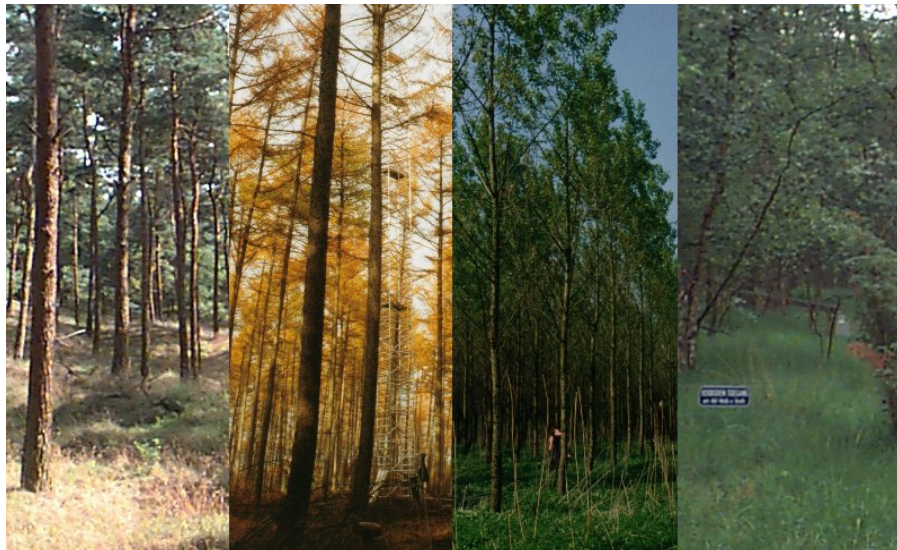

Figure 3: Bosopstanden. Van links naar rechts, het Loobos, het Bankenbos, het Fleditebos en Kampina



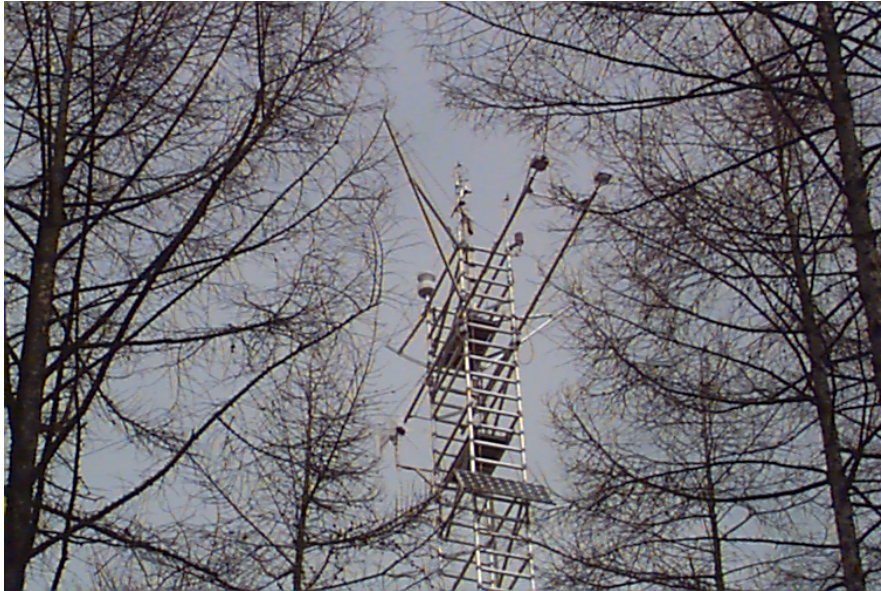

Figure 4: Meetinstrumentatie in het Bankenbos. Boven het zonnepaneel zijn duidelijk de uitgestoken stralingsmeters te zien, daarboven vanaf het hoogste platform de telescoopmast met eddycorrelatie-instrumentatie. Op het hoogste platform vinden de automatische metingen van weersvariabelen, zoals temperatuur en neerslag plaats.

werden de overgebleven gegevens in een database geplaatst. Die gegevens zijn uiteindelijk op de bij de brochure toegevoegde CD gezet en gebruikt voor alle berekeningen.

Table 2: Fysische opstandskenmerken van de vier onderzochte lokaties, h is de gemiddelde boomhoogte en LAI de bladdichtheid.

| Locatie                                   | H<br>(m) | LAI<br>(m <sup>2</sup> m <sup>-2</sup> ) |
|-------------------------------------------|----------|------------------------------------------|
| <b>Zeewolde: Populier</b>                 | 16       | 3.9                                      |
| <b>Kootwijk: Grove den</b>                | 15       | 1.9                                      |
| <b>Veenhuizen: Lariks</b>                 | 23       | 1.9                                      |
| <b>Boxtel: Gemengd loof- en naaldhout</b> | 18       | 3.5                                      |

## 5 Experimentele resultaten

### 5.1 Totale verdamping, interceptie, transpiratie en afvoer

In Figuur ?? is de grootte van de gemiddelde verdampingstermen voor de vier bossen weergegeven. Het meest verdampen het grove dennenbos bij Kootwijk op de Veluwe en het populierenbos in de Flevo-polder. De hoge verdamping wordt bij dit populierenbos hoofdzakelijk bepaald door de transpiratie en bij het grove dennenbos door de interceptie. Het gemengde loof/naaldbos bij Kampina verdampt het minst. Op jaarbasis zijn de interceptieverliezen van de blad of naaldverliezende soorten het laagst. Daardoor krijgen het Loobos en Kampina de hoogste interceptieverliezen. Dit wordt des te duidelijker indien alleen naar de wintermaanden wordt gekeken, het interceptieverlies van de blad- of naaldverliezende soorten ligt dan rond de 15% terwijl dit voor de andere soorten rond de 28% blijft liggen (zie Tabel 3). De variatie in totale verdamping bedraagt *tussen bostypen* gemiddeld ongeveer 75mm op jaarbasis. Echter, bij een enkel bostype kan *door de jaren* heen een variatie van twee keer deze grootte worden vastgesteld. Afhankelijk van de balans tussen interceptie en transpiratie is het waterverbruik van het bijvoorbeeld grove den in 1995 en 1996 lager dan populier, maar in 1998 duidelijk hoger. De verschillen door de jaren heen zijn gerelateerd aan grootschalige klimaatinvloeden zoals straling, temperatuur, wind en neerslag.

Bij populieren is de variatie in transpiratie door de jaren heen het grootst, bij grove den het kleinst. Dit heeft te maken met het feit dat populieren slechte regelaars van hun transpiratie zijn, en in warme droge jaren in eerste instantie opportunistisch veel verdampen, maar dan later in het seizoen hun blad snel laten vallen en gaan lijden onder bodemvocht tekorten. Grove dennen sluiten hun huidmondjes eerder en voorkomen zo dat er stresssituaties ontstaan. Deze verschillen in adaptatiestrategieën zijn belangrijk bij de bepaling van het effect van bos op de waterhuishouding. Transpiratie van bossen in Nederland is gemiddeld 400mm per jaar.

Variatie in interceptieverlies door de jaren wordt vooral bepaald door de hoogte van de neerslagsom: meer neerslag levert meer interceptie op. De stijgende lijn in interceptieverlies over 1995-1999 heeft dan ook alles te maken met een toename in neerslag in die vier jaren. De grootte van de interceptie als percentage van de neerslag wordt bepaald door de neerslagintensiteit. Met andere woorden veel buien met een lage intensiteit zorgen voor een hoog interceptieper-

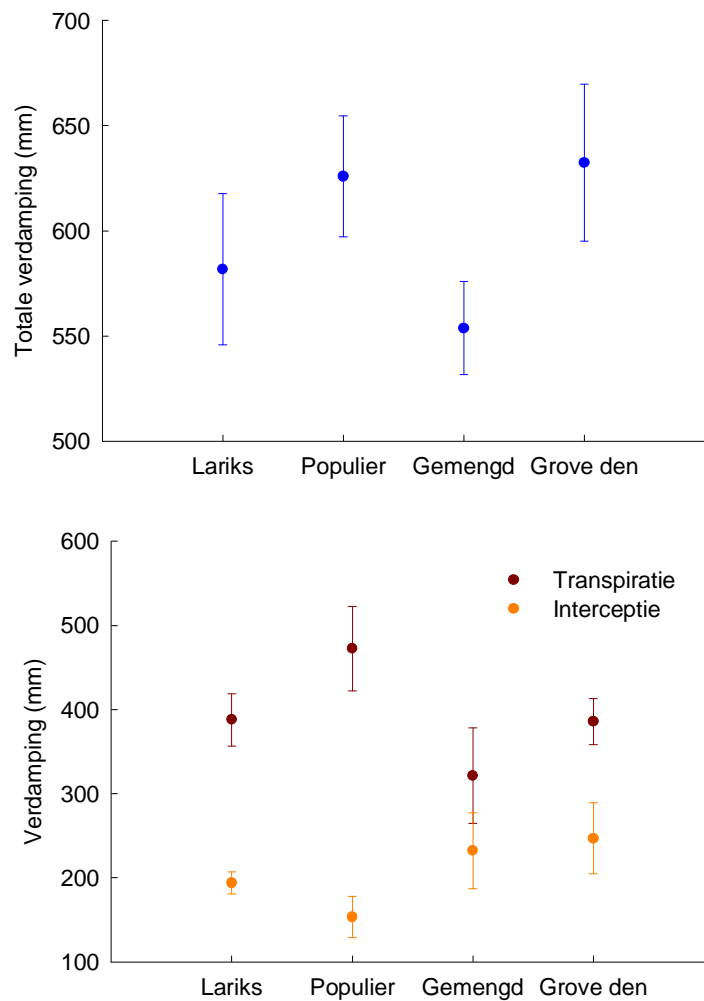

Figure 5: Gemiddelde totale gemeten verdamping per lokatie en bostype. De gemiddelde verdamping bedraagt 625 tot 630 mm per jaar voor grove den en populier, en neemt af van Lariks 580 mm per jaar naar 555 mm per jaar voor de gemengde opstand in Kampina. De verschillen worden bepaald door de verhouding tussen interceptie en transpiratie. Let ook op de spreiding per lokatie, hier weergegeven door de standard fout (de verticale lijnen): deze is vaak even groot als de verschillen tussen de lokaties.

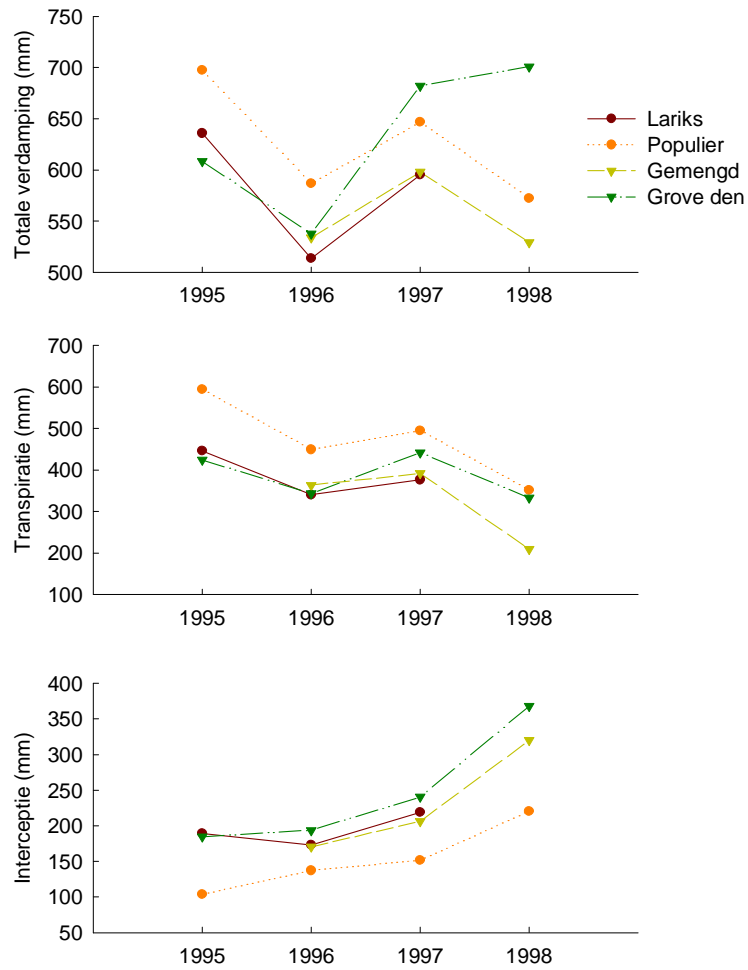

Figure 6: Totale jaarlijkse verdamping, transpiratie en interceptie per lokatie voor de 4 meetjaren. De variatie tussen jaren bedraagt 100 tot 150 mm per lokatie. De transpiratie varieert minder dan de interceptie. Het interceptieverlies is vooral afhankelijk van de hoeveelheid neerslag.

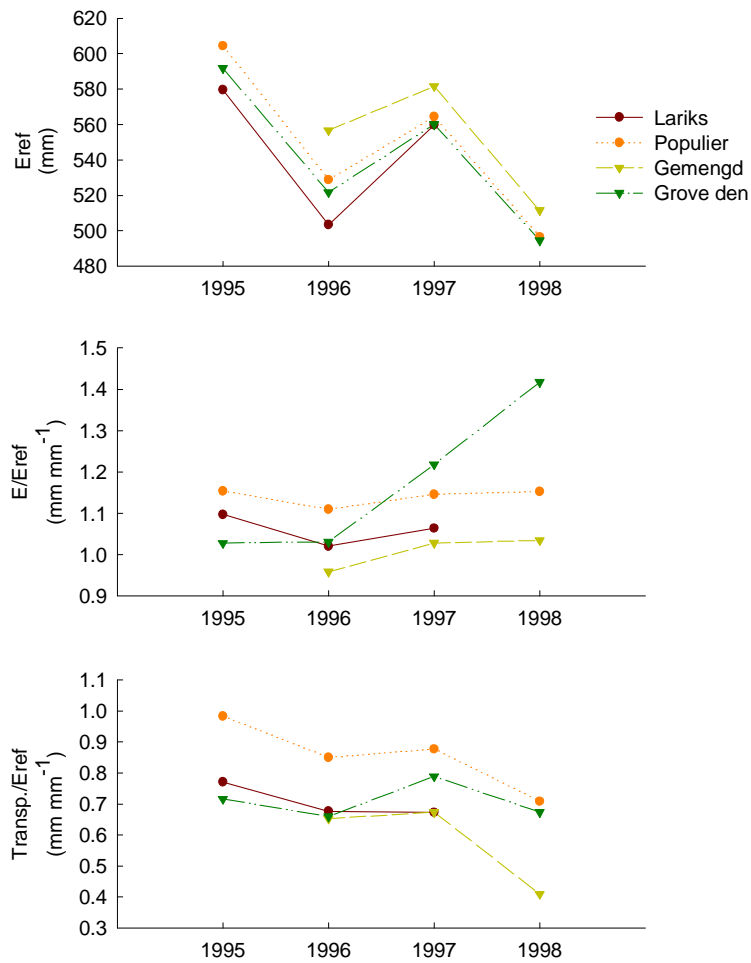

Figure 7: Makkink referentieverdamping en de verdampingsfactor voor de vier bostypen. Voor de totale verdamping is de factor groter dan 1. De hoge factor in 1998 van het grove dennenbos wordt veroorzaakt door een hoge interceptie gecombineerd met een minder sterke afname van de transpiratie. De factor voor alleen transpiratie is substantieel lager dan 1. Bij het gemengde bos van Kampina ligt deze in 1998 zelfs onder 0.5.

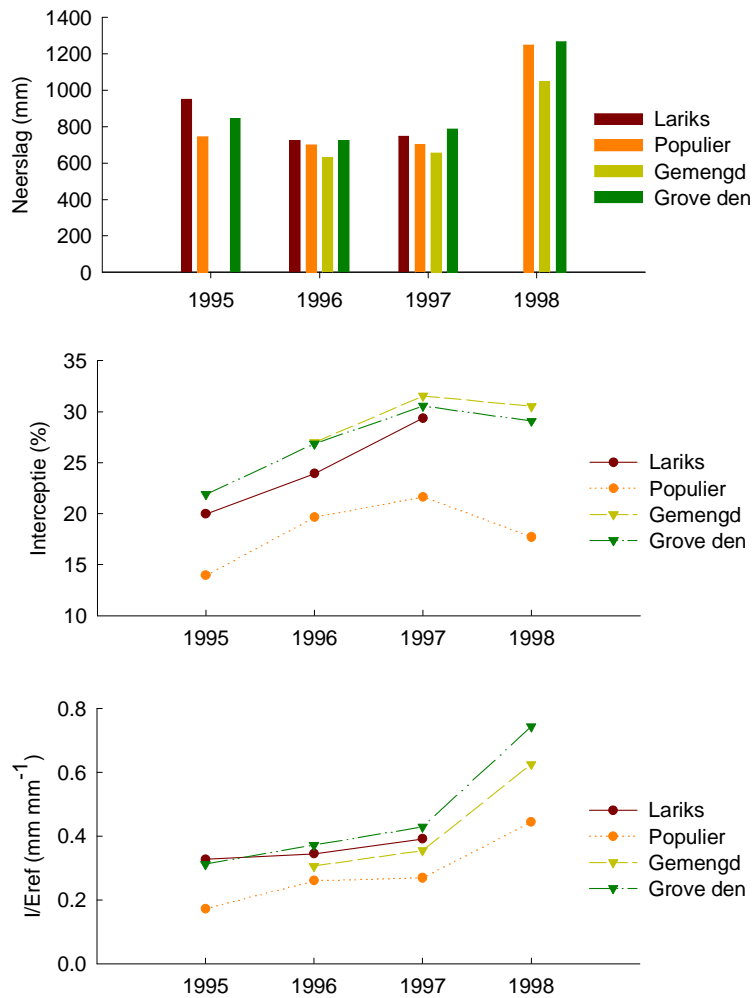

Figure 8: Neerslag, interceptie verlies als percentage van de neerslag en de verdampingsfractie voor interceptie. Let op de variatie in percentages tussen de bostypen. Interceptie hangt vooral af van de neerslag, dus is een duidelijk verband met de referentieverdamping, zoals wel bij de transpiratie is aangetroffen, bij de interceptieverdamping afwezig.

Table 3: Gemiddelde en standard fout van de transpiratie en interceptie voor de vier onderzochte lokaties. De interceptie is tevens als percentage van de neerslag gegeven met tussen haakjes de waarden voor de zomer en de winter.

| Opstand          | Transpiratie       |     | Interceptieverlies |     |    |         |
|------------------|--------------------|-----|--------------------|-----|----|---------|
|                  | mm j <sup>-1</sup> |     | mm j <sup>-1</sup> |     | %  | (z/w)   |
| <b>Populier</b>  | 470                | ±50 | 150                | ±25 | 18 | (22/14) |
| <b>Grove den</b> | 385                | ±30 | 245                | ±40 | 27 |         |
| <b>Lariks</b>    | 390                | ±35 | 195                | ±15 | 24 | (26/16) |
| <b>Gemengd</b>   | 320                | ±55 | 230                | ±45 | 30 |         |

centage.

## 5.2 Bodemvocht en berging

De hoeveelheid bodemvocht speelt een belangrijke rol bij het genereren van afvoer, het reguleren van transpiratie en het bepalen van de aanvulling naar het grondwater. De variatie in bodemvocht door de jaren heen is vrijwel gelijk. Meestal vult de hoeveelheid vocht in de onverzadigde zone tijdens de winter voldoende aan, om in de lente weer op veldcapaciteit te zijn. Bij de onderzochte bossen is alleen in de droge zomer van 1996 sprake geweest van substantiele tekorten aan bodemvocht. Echte gevolgen voor de transpiratie in dit jaar lijkt dit niet gehad te hebben: in ieder geval kon het niet eenduidig worden vastgesteld. Wel is goed in de figuren te zien hoe gemiddeld in de zomer de hoeveelheid bodemvocht afneemt. Over de gemeten dieptes zijn variaties van 100-150 mm geen uitzondering.

De grondwaterstand van populier, grove den en lariks toont een vrij regelmatig verloop. Te zien is hoe met name in het gemengde bos in Kampina, het grondwater regelmatig aan het oppervlak komt, en hoe op de Veluwe een dalende trend pas in 1998 omgebogen wordt, na een winter met 1300 mm neerslag. Op de drie andere lokaties is het verloop door de jaren heen minimaal. De combinatie van grondwaterstand en mate van verzadiging van de onverzadigde zone bepaald hoeveel water er geborgen kan worden. Duidelijk is ook te zien hoe in kleigrond (bij het Fleditebos in de polder) veel meer water in de onverzadigde zone vastgehouden kan worden dan op de zandgronden van bijvoorbeeld de Veluwe.

De bewortelingsdiepte en de samenstelling van de bodem van een bos bepalen in hoge mate hoeveel vocht er beschikbaar is voor transpiratie. Wortels gebruiken in eerste instantie vocht uit de bovenste laag van de onverzadigde zone en pas later via capillaire nalevering vocht uit het grondwater. Het maximale verschil tussen de hoeveelheid bodemvocht in de winter en dat in de zomer is een indicatie voor de hoeveelheid water dat door de bodem kan worden vastgehouden. Dit water kan vervolgens voor transpiratie worden gebruikt. Voor de meeste bossen ligt dit rond de 150 mm. Voor het gemengde naald-/loofbos in Kampina is dit 200 mm. Dit wordt o.a. veroorzaakt door de ter plaatse genomen vernattingsmaatregelen, waardoor de grondwaterstanden tot in het maaiveld komen. Op de lokatie in het Fleditebos lijkt het dat de populieren vocht uit het grondwater gebruiken, direct door diepe wortels en indirect door nalevering. Op de lokatie op de Veluwe bij Kootwijk bestaat het vermoeden dat diepe wortels in perioden van droogte nog in staat zijn vocht uit het grondwater

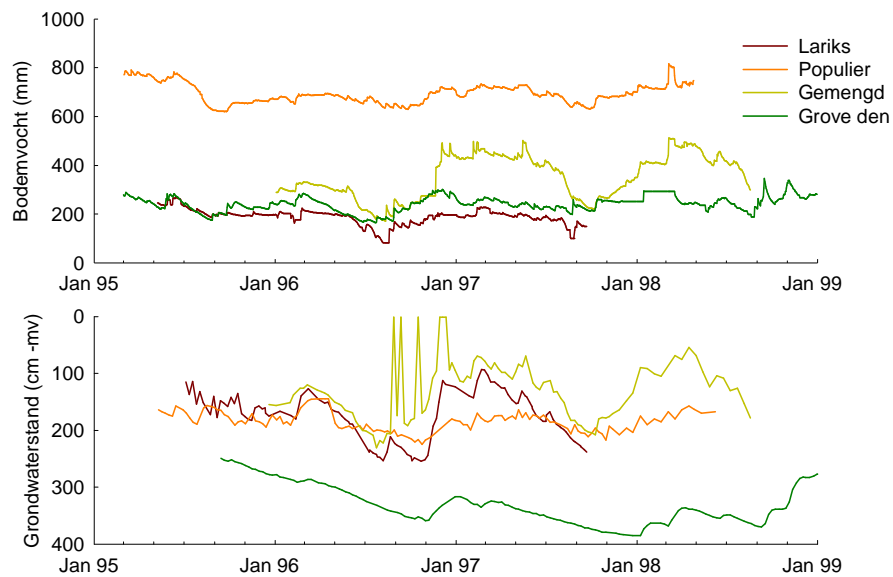

Figure 9: Het verloop van het bodemvocht en de grondwaterstand. Het bodemvocht is berekend over het volledige wortelprofiel. Het bodemvocht komt elk jaar weer min of meer op peil. Voor het weer op peil brengen van de grondwaterstand is veel meer water nodig. Dit is goed te zien voor de lokatie met het grove dennenbos.



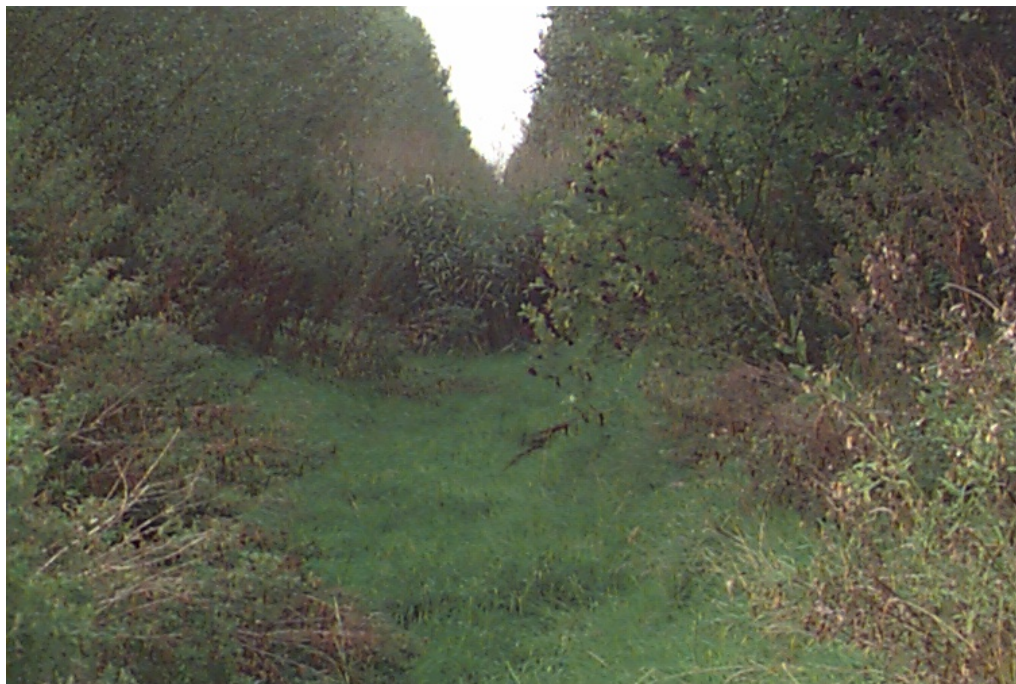

Figure 10: Een niet onderhouden sloot in het Purmerbos.

(dieper dan 3 m) te halen.

### 5.3 Afvoer naar grondwater en open water

De hoeveelheid water dat overblijft nadat men de totale verdamping van de neerslag aftrekt, kan of direkt afstromen, of het bodemvocht aanvullen en vervolgens het grondwater. Dit overschot bedraagt gemiddeld 235 mm op jaarbasis, waarbij het grove denbos op de stuifduinen er duidelijk positief uitspringt (zie Tabel 4).

Bekijkt men de verdeling over de jaren, dan valt op dat het populierenbos en het gemengde naald- en loofbos voor het hydrologisch jaar oktober 1995 tot oktober 1996 water uit de bodem moeten "lenen" om de transpiratie op gang

Table 4: Gemiddelde en standard fout van de neerslag, de totale verdamping, en dat gedeelte van de neerslag dat ten goede kan komen aan de aanvulling van het grondwater of direct afstroomt.

| Opstand   | Neerslag<br>$\text{mm j}^{-1}$ |           | Totale verdamping<br>$\text{mm j}^{-1}$ |          | Overschot<br>$\text{mm j}^{-1}$ |           |
|-----------|--------------------------------|-----------|-----------------------------------------|----------|---------------------------------|-----------|
| Populier  | 845                            | $\pm 135$ | 625                                     | $\pm 30$ | 220                             | $\pm 150$ |
| Grove den | 900                            | $\pm 125$ | 630                                     | $\pm 35$ | 270                             | $\pm 100$ |
| Lariks    | 805                            | $\pm 70$  | 580                                     | $\pm 35$ | 225                             | $\pm 45$  |
| Gemengd   | 780                            | $\pm 135$ | 555                                     | $\pm 20$ | 225                             | $\pm 145$ |

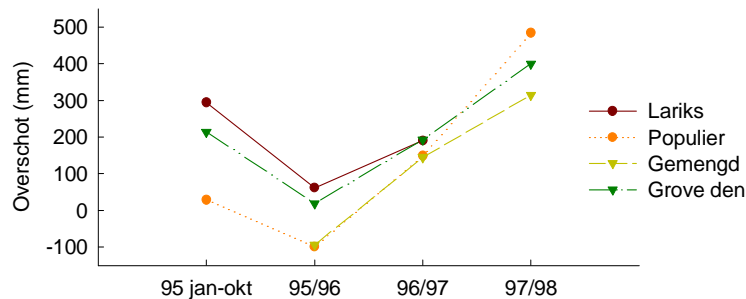

Figure 11: De hoeveelheid neerslag die overblijft indien de verdamping ervan wordt afgetrokken. Het overschot is hier weergegeven voor de 4 bemeten lokaties, waarbij hydrologische jaren (oktober - oktober) zijn gebruikt. Het populieren bos en het gemengde naald-/loofbos hebben in 1996 duidelijk aanvulling van water vanuit de bodem nodig gehad om aan de verdamping te kunnen voldoen. Voor 1995 ontbreken de laatste 3 maanden van 1994.

te houden. Dat het overschot voor een belangrijk deel bepaald wordt door het tijdstip in het jaar en de hoeveelheid neerslag die op een bepaalde plek valt, blijkt wel uit het feit dat in het jaar 1997/1998 het overschot op de populieren locatie het hoogst is van allemaal. Deze stijging in het overschot ten opzichte van dat van het grove dennenbos wordt veroorzaakt door:

- een lagere interceptie van de populieren, vooral gedurende de bladloze periode wanneer de hoeveelheid neerslag relatief groot is en

- door het feit dat de transpiratie van de populieren in veel sterkere mate gekoppeld is aan de straling (lees referentieverdamping), die in de zomermaanden van 1998 erg laag is.

In het Purmerbos zijn zowel grondwaterstanden, waterstanden van sloten en afvoer bepaald sinds de aanplant jaren negentig. De grote vraag was toen of de aanplant van bos een meetbaar effect op de afvoer zou hebben en of het niet onderhouden en de daardoor optredende verlanding van sloten een probleem zou opleveren. Het blijkt dat in de verlande sloten het waterpeil gemiddeld hoger staat dan in de onverlande sloten. Dit wordt ook veroorzaakt doordat de duiker sin deze sloten niet onderhoudn worden en gedeeltelijk dichtgeslibd zijn. Dit levert een bijdrage aan de berging van water in het bosgebied. De ruimte tussen de hogere waterstand in de verlande sloten en in de onderhouden sloten is een maat voor de extra bergingscapaciteit. Men kan dus concluderen dat in bosgebieden minder onderhoud aan sloten nodig is, en dat dit zelfs een positief effect op de bergingscapaciteit van bosgebieden heeft. In de lokatie in het Purmerbos blijkt bovendien uit onderzoek dat hoge waterstanden en grondwaterpeilen tot nu toe geen nadelig effect op de groei van het bos hebben gehad.

Afvoeren zijn gemeten bij het gemaal in het Purmerbos. Het Purmerbos heeft 4% open water en een drooglegging van 70 cm. Dit is vergeleken met een graslandpolder, de Wogmeer, met 3% open water en een drooglegging van 80 cm. In de figuur is duidelijk te zien hoe op een zelfde bui, het bos anders

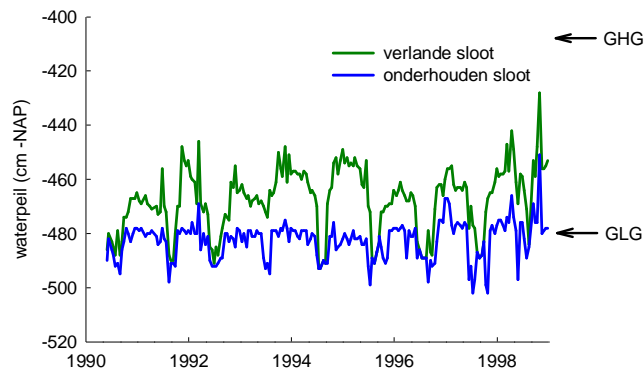

Figure 12: Waterstanden in verlande en onderhouden sloten in het Purmerbos. De verlande (niet opgeschoonde) sloten hebben een hogere waterstand. Hier wordt in natte periodes dus veel water geborgen. Tevens zijn de gemiddelde laagste en hoogste grondwaterstand (GLG en GHG) aangegeven

reageert dan een vergelijkbaar stuk grasland. In de graspolder zijn de afvoerpieken veel groter dan in het bos. Uit deze vergelijking volgt dat bosaanplant een remmende werking op de afvoerbelaasting heeft. Het is de combinatie van hoge verdamping van bos en berging door verlande sloten die hiervoor in hoofdzaak verantwoordelijk is.

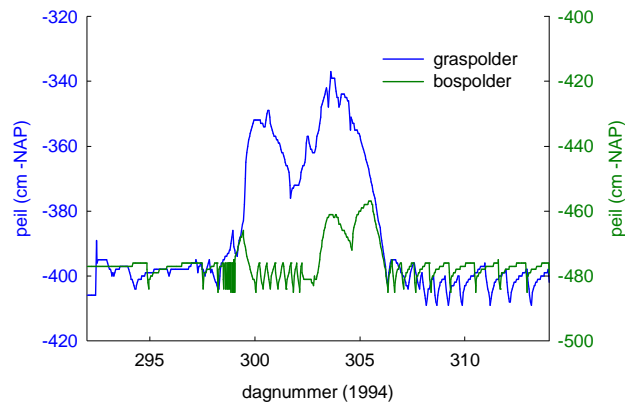

Figure 13: Waterpeilen gemeten vlak voor het gemaal van twee vergelijkbare polders waarvan een met grasland en een met bos. De haaietanden geven de normale activiteit van het gemaal weer. Voor deze bui blijkt het grasland zo'n aanvoer van water te genereren dat het gemaal het waterpeil niet onder het streefpeil kan houden, bij het bos lukt dit aanzienlijk beter. De afvoerpiek in het grasgebied is veel hoger dan van het bos. Hier heeft de aanleg van het bos dus voor een verlaging van de piekbelasting gezorgd.

Table 5: Gewasfactoren voor de Makkink referentie verdamping

|                    | Grove den | Populier | Lariks | Gemengd |
|--------------------|-----------|----------|--------|---------|
| <b>gewasfactor</b> | 0.64      | 0.99     | 0.76   | 0.91    |

## 6 Berekening dagelijkse verdamping

Vaak zijn schattingen nodig van het waterverbruik van bossen om beleidsmaatregelen of effecten van peilbeheer door te kunnen rekenen. De mate van detail waarin deze berekeningen moeten worden uitgevoerd varieert afhankelijk van de detaillering van de vraagstelling. De resultaten van dit project zijn dan ook in verschillende vorm weergegeven. Om hulp te bieden bij het berekenen van effecten van bos-aanplant of verwijdering zijn op de CD een aantal berekeningswijzen te vinden. Voor zeer gedetailleerde berekeningen (bijvoorbeeld als inzicht in de dagelijkse gang nodig is) moeten redelijk complexe modellen gebruikt worden. Hiervoor is het model SWAPS beschikbaar. Waarden voor de benodigde parameters zijn ook op de CD te vinden.

Meestal echter ontbreken de benodigde invoergegevens voor uurberekeningen en moet teruggevallen worden op berekeningen op dagbasis. Deze berekeningen staan in deze sectie kort beschreven. De details van verschillende berekeningen staan uitgewerkt op de CD.

Om transpiratie uit te rekenen kan gebruik gemaakt worden van de Penman-Monteith vergelijking of die van Makkink. Als voorbeeld staan in de Tabel 5 de waarden van de gewasfactor die voor de standaard Makkink methode gebruikt kunnen worden.

De hier gegeven methode verwaarloost de reductie in transpiratie die optreedt als het bodemvochtttekort te groot wordt. In de onderzochte periode is dit voor geen van de bossen vast te stellen uit de metingen. Dat bodemvochtttekorten in droge zomers voor reductie kunnen zorgen wordt echter algemeen aangenomen. Hiervoor zou een ad hoc correctie moeten worden toegepast. In de literatuurlijst op de CD zijn hiervan voorbeelden te vinden.

De meest gemakkelijke methode om interceptieverdamping uit te rekenen is om het interceptieverlies te bepalen als een fractie van de bruto neerslag per dag. Dit kan op dagbasis tot nogal grote fouten leiden, maar gemiddeld genomen zal het correct zijn. In 6 zijn de interceptiepercentages voor de in dit project onderzochte bossen en een aantal andere weergegeven. Adequate gemiddelde waarden zijn voor gemengd loofbos 28% en 39% voor Douglas.

Table 6: Interceptiepercentages voor een groot aantal Nederlandse bossen. Vaak zijn deze bepaald op jaarbasis

| Locatie     | Bostype          | Interceptiepercentage |
|-------------|------------------|-----------------------|
| Kootwijk    | Grove Den        | 27                    |
| Zeewolde    | Populier         | 22 (z) 14 (w)         |
| Veenhuizen  | Lariks           | 26 (z) 16 (w)         |
| Boxtel      | Gemengd Loofbos  | 30                    |
| Castricum   | Oostenrijkse Den | 62                    |
| Castricum   | Zomer eik        | 34 (z) 16 (w)         |
| Winterswijk | Gemengd Loofbos  | 24                    |
| Hackfort    | Gemengd Loofbos  | 29                    |
| Sleen       | Gemengd Loofbos  | 28                    |
| Ede         | Amerikaanse Eik  | 20 (z) 8 (w)          |
| Kootwijk    | Douglas          | 36                    |
| Garderen    | Douglas          | 43                    |
| Garderen    | Douglas          | 31                    |
| Zelhem      | Douglas          | 44                    |
| Winterswijk | Gemengd loofbos  | 30                    |

## 7 Bos en water: vriend of vijand?

### 7.1 Verdrogingsbestrijding

Bossen verbruiken water. Hierin zijn zij niet anders dan andere vegetatievormen die ook water verdampen. Wel blijken zij gemiddeld meer water te gebruiken. Dit blijkt onder andere uit het feit dat de totale verdamping van bossen hoger ligt dan de referentieverdamping voor gras ( $\pm 450$  mm per jaar). Dit verschil wordt vooral bepaald door de interceptieverdamping. Deze bedraagt 20-44% van de jaarlijkse bruto neerslag en is dus een direct verlies voor het systeem. Gelukkig transpireren bossen minder dan vegetaties die minder hoog zijn zoals grassen, heide en landbouwgewassen. Uiteindelijk bepaalt de balans tussen deze twee termen hoe groot de invloed van bos op de waterhuishouding is. Transpireren bossen veel, zoals donker naaldhout (bijv. Douglas), dan komt het totale waterverbruik samen met interceptie ver uit boven dat van een grasland. Transpireren ze minder, zoals bij licht naaldhout (bijv. grove den) of eik, dan zijn de verschillen in waterverbruik minder dramatisch.

In onderstaande figuur is globaal de waterbalans van een hypothetisch bos en van een grasland weergegeven voor een gemiddeld jaar. Het bos levert minder grondwateraanvulling: 28% versus 40% voor gras. Transpiratie van de beide vormen van landgebruik is vrijwel gelijk en bedraagt met verdamping uit de bodem en ondergroei 50% van de neerslag. Tussen bossen onderling zijn er verschillen gevonden in interceptieverlies die tot 10% van de neerslag bedragen. Voor transpiratie zijn de verschillen rond de 150mm. Deze orde van grootte voor transpiratieverschillen is ook van toepassing voor verschillen van een soort voor opeenvolgende jaren. Voorzichtigheid is dus geboden met het rekenen met gemiddelde waarden voor transpiratie. Voor interceptie daarentegen kan eigenlijk alleen met percentages gerekend worden. In een nat jaar zal het interceptieverlies veel hoger zijn dan in een droog jaar. De hier gepresenteerde metingen suggereren dat er enige vorm van compensatie tussen deze twee ter-

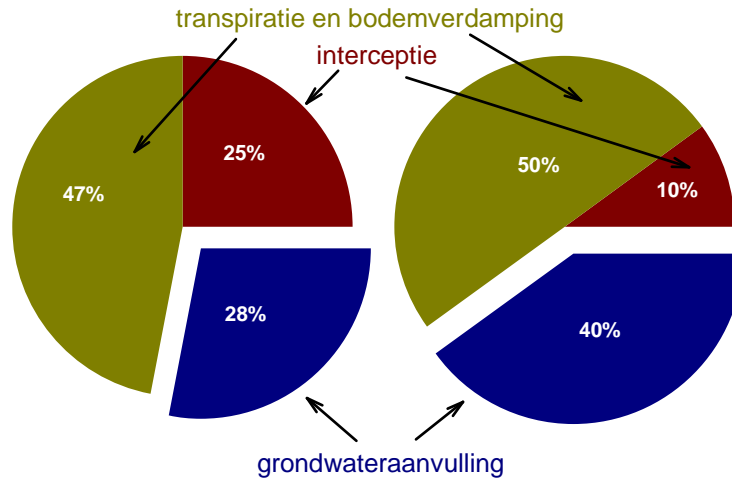

Figure 14: Taartdiagrammen voor de verschillende termen van de waterbalans van bos (links) en grasland (rechts). Bos heeft minder grondwateraanvulling dan grasland.

men optreedt, waardoor het totale waterverbruik door de jaren heen minder variatie vertoont dan de termen zelf.

## 7.2 Verdamppt de ene soort meer dan de andere?

Wat betekenen deze bevindingen nu voor projecten waar door middel van bebossing of ontbossing wordt gepoogd de waterhuishouding te beïnvloeden? Bij aanplant van bos zal altijd rekening moeten worden gehouden met een groter waterverbruik. Een eerste orde schatting is dat dit extra verbruik vooral wordt veroorzaakt door het interceptieverlies. Een vergelijking met de hypothetische waterbalansen van bos en gras suggereert dat dit 15% van de jaarlijkse bruto neerslag is. Verschillen tussen bossen zijn grotendeels ook hierop terug te voeren. Zo blijkt er relatief weinig verschil te zijn tussen het waterverbruik van grove den en eik, echter wel tussen Douglas en grove den. Extra verschillen in transpiratie maken het waterverbruik van Douglas nog hoger. Omvorming van donker naar licht naalddhout of loofbos heeft dus een gunstig effect op de grondwateraanvulling.

## 7.3 Slootonderhoud

Het bleek dat in het Purmerbos het niet onderhouden en het daardoor verlanden van sloten een positief effect op de berging had en tot vertraging in de piekafvoeren leidde. De directe betekenis hiervan moet niet onderschat worden. De aanleg van sloten bij bosaanplant moet dus volgens specifieke bos-criteria worden ingevuld. Wellicht is het zelfs mogelijk met aanzienlijk minder sloten toe

te kunnen dan nu gebruikelijk is. De relatief geringe gevoeligheid van bepaalde boomsoorten voor kortstondige perioden waarin hun wortels in het water staan geeft aan zo'n optie extra steun. In ieder geval kan het aantal sloten en de mate van slootonderhoud in bosgebieden gereduceerd worden.

## **7.4 Waterberging**

In het gemengde bos bij Kampina is de grondwaterstand tijdens de meetperiode geleidelijk verhoogd. Hierdoor komen grote delen van het gebied onder water te staan. De bomen lijken hiervan nog geen last te hebben. In het Purmerbos bleek dat meer berging van open water mogelijk was en dat onderhoud aan sloten in bosgebieden minder intensief kan dan in vergelijkbare bouwlanden. Hier is de invloed van bos op de bergingsmogelijkheden positief en kunnen bosgebieden wellicht gebruikt worden bij demping van afvoer- en overstromingspieken

## **7.5 De toekomst: bossen als koolstofvastleggers?**

Gaandeweg het project werd het mogelijk om in het kader van een door de Europese Unie gefinancierd project ook de uitwisseling van CO<sub>2</sub> te bepalen. Met name na het afsluiten van het Kyoto protocol is er sterk aandacht voor de rol van bossen bij opname van CO<sub>2</sub>. In de laatste drie jaar van het project is ook de koolstofopname van het grove dennenbos in het Loobos vastgesteld. Ook hier blijkt dat er grote verschillen tussen de jaren in koolstofopname bestaan, maar dat er gemiddeld genomen relatief veel koolstof wordt vastgelegd. De resultaten van dit onderzoek dragen mogelijk bij aan verantwoorde beleidsbeslissingen waarin de voordelen van CO<sub>2</sub> opname door bossen afgewogen kunnen worden tegen het eventuele hogere waterverbruik van bossen.
